# Supplementary material
Source: publisher figshare collection journal article supplement (https://gsajournals.figshare.com/ndownloader/files/14675435)
Supplement: Supplementary file 1 [file 14675435]

## Sheet: Center
#3_10-08-15
Frame	time, sec	F total
756	0.031	1314066
757	0.062	1299385
758	0.093	1282256
759	0.124	1370387
760	0.155	1468232
761	0.186	1565746
762	0.217	1661494
763	0.248	1726177
764	0.279	1783494
765	0.31	1807095
766	0.341	1788259
767	0.372	1749737
768	0.403	1710971
769	0.434	1659326
770	0.465	1611807
771	0.496	1583218
772	0.527	1553048
773	0.558	1526516
774	0.589	1492651
775	0.62	1504943
776	0.651	1611991
777	0.682	1704181
778	0.713	1802212
779	0.744	1867589
780	0.775	1906022
781	0.806	1928124
782	0.837	1921798
783	0.868	1880186
784	0.899	1826955
785	0.93	1759333
786	0.961	1711447
787	0.992	1665785
788	1.023	1628605
789	1.054	1596476
790	1.085	1550683
791	1.116	1513085
792	1.147	1488612
793	1.178	1572244
794	1.209	1707863
795	1.24	1803370
796	1.271	1866207
797	1.302	1899216
798	1.333	1937638
799	1.364	1905114
800	1.395	1838836
801	1.426	1779360
802	1.457	1715892
803	1.488	1665805
804	1.519	1620937
805	1.55	1572251
806	1.581	1533951
807	1.612	1497917
808	1.643	1489797
809	1.674	1472596
810	1.705	1444018
811	1.736	1418726
812	1.767	1395412
813	1.798	1373112
814	1.829	1355882
815	1.86	1325887
816	1.891	1370997
817	1.922	1488199
818	1.953	1599286
819	1.984	1686568
820	2.015	1719733
821	2.046	1754680
822	2.077	1798257
823	2.108	1763254
824	2.139	1717781
825	2.17	1653555
826	2.201	1609765
827	2.232	1562676
828	2.263	1517468
829	2.294	1491134
830	2.325	1446628
831	2.356	1414920
832	2.387	1380386
833	2.418	1349906
834	2.449	1331627
835	2.48	1300831
836	2.511	1287969
837	2.542	1271846
838	2.573	1263776
839	2.604	1268445
840	2.635	1254122
841	2.666	1245944
842	2.697	1233040
843	2.728	1221053
844	2.759	1216904
845	2.79	1199039
846	2.821	1201012
847	2.852	1283132
848	2.883	1401528
849	2.914	1508112
850	2.945	1565427
851	2.976	1616656
852	3.007	1651304
853	3.038	1686076
854	3.069	1688022
855	3.1	1628734
856	3.131	1580483
857	3.162	1534272
858	3.193	1499754
859	3.224	1460773
860	3.255	1420385
861	3.286	1386661
862	3.317	1360080
863	3.348	1344614
864	3.379	1323989
865	3.41	1298637
866	3.441	1284316
867	3.472	1267730
868	3.503	1256903
869	3.534	1249045
870	3.565	1224305
871	3.596	1212156
872	3.627	1200391
873	3.658	1190165
874	3.689	1182309
875	3.72	1162917
876	3.751	1154964
877	3.782	1145274
878	3.813	1136764
879	3.844	1133163
880	3.875	1120711
881	3.906	1117600
882	3.937	1111878
883	3.968	1102475
884	3.999	1104370
885	4.03	1087245
886	4.061	1083607
887	4.092	1079759
888	4.123	1076094
889	4.154	1080850
890	4.185	1071852
891	4.216	1070609
892	4.247	1065145
893	4.278	1063159
894	4.309	1063087
895	4.34	1050639
896	4.371	1044211
897	4.402	1037569
898	4.433	1031614
899	4.464	1029029
900	4.495	1019931
901	4.526	1016454
902	4.557	1014652
903	4.588	1010016
904	4.619	1013489
905	4.65	1005094
906	4.681	1003360
907	4.712	1001228
908	4.743	1000434
909	4.774	1007382
910	4.805	999378
911	4.836	998260
912	4.867	997376
913	4.898	999296
914	4.929	1003691
915	4.96	998274
916	4.991	1003650
917	5.022	1006096
918	5.053	1004598
919	5.084	1008634
920	5.115	1002314
921	5.146	999468
922	5.177	1000017
923	5.208	999086
924	5.239	1004226
925	5.27	998555
926	5.301	997619
927	5.332	999884
928	5.363	995556
929	5.394	998997
930	5.425	988333
931	5.456	986138
932	5.487	986217
933	5.518	984763
934	5.549	987124
935	5.58	977352
936	5.611	974383
937	5.642	973350
938	5.673	981340
939	5.704	975469
940	5.735	971142
941	5.766	972582
942	5.797	971148
943	5.828	980769
944	5.859	979079
945	5.89	969014
946	5.921	966892
947	5.952	967793
948	5.983	975320
949	6.014	971925
950	6.045	963145
951	6.076	966189
952	6.107	987748
953	6.138	1035562
954	6.169	1071408
955	6.2	1122470
956	6.231	1170108
957	6.262	1210107
958	6.293	1251703
959	6.324	1250393
960	6.355	1226255
961	6.386	1195253
962	6.417	1168688
963	6.448	1147736
964	6.479	1118580
965	6.51	1095761
966	6.541	1077889
967	6.572	1063047
968	6.603	1047656
969	6.634	1027083
970	6.665	1010864
971	6.696	994736
972	6.727	993478
973	6.758	974667
974	6.789	958932
975	6.82	949522
976	6.851	937177
977	6.882	940074
978	6.913	927645
979	6.944	913557
980	6.975	909667
981	7.006	908676

## Sheet: Posterior
Frame	time, sec	F total
756	0.031	1522555
757	0.062	1500897
758	0.093	1475739
759	0.124	1517432
760	0.155	1547202
761	0.186	1575807
762	0.217	1639444
763	0.248	1674019
764	0.279	1744557
765	0.31	1756877
766	0.341	1772781
767	0.372	1768579
768	0.403	1742837
769	0.434	1712691
770	0.465	1676550
771	0.496	1659781
772	0.527	1641094
773	0.558	1612927
774	0.589	1594009
775	0.62	1590438
776	0.651	1634246
777	0.682	1671882
778	0.713	1722981
779	0.744	1775828
780	0.775	1817842
781	0.806	1846584
782	0.837	1845203
783	0.868	1849183
784	0.899	1827851
785	0.93	1774624
786	0.961	1740071
787	0.992	1708530
788	1.023	1676923
789	1.054	1655751
790	1.085	1613645
791	1.116	1582664
792	1.147	1557912
793	1.178	1597727
794	1.209	1680019
795	1.24	1739301
796	1.271	1800082
797	1.302	1856456
798	1.333	1848086
799	1.364	1879169
800	1.395	1852003
801	1.426	1816040
802	1.457	1768988
803	1.488	1729861
804	1.519	1693847
805	1.55	1654071
806	1.581	1619676
807	1.612	1588330
808	1.643	1576753
809	1.674	1564233
810	1.705	1539487
811	1.736	1511938
812	1.767	1488596
813	1.798	1463382
814	1.829	1446756
815	1.86	1418143
816	1.891	1515087
817	1.922	1573554
818	1.953	1637748
819	1.984	1705877
820	2.015	1750106
821	2.046	1804958
822	2.077	1768300
823	2.108	1786902
824	2.139	1766006
825	2.17	1708479
826	2.201	1670672
827	2.232	1629257
828	2.263	1588025
829	2.294	1564163
830	2.325	1515757
831	2.356	1486804
832	2.387	1452736
833	2.418	1421315
834	2.449	1404569
835	2.48	1369130
836	2.511	1356831
837	2.542	1340348
838	2.573	1331455
839	2.604	1331697
840	2.635	1313214
841	2.666	1305435
842	2.697	1290930
843	2.728	1275070
844	2.759	1267177
845	2.79	1248134
846	2.821	1282079
847	2.852	1387269
848	2.883	1450285
849	2.914	1529176
850	2.945	1586593
851	2.976	1644630
852	3.007	1691393
853	3.038	1687844
854	3.069	1702153
855	3.1	1672161
856	3.131	1637099
857	3.162	1599266
858	3.193	1569141
859	3.224	1541329
860	3.255	1501926
861	3.286	1470043
862	3.317	1443160
863	3.348	1424405
864	3.379	1406981
865	3.41	1379667
866	3.441	1364258
867	3.472	1345747
868	3.503	1330034
869	3.534	1322041
870	3.565	1292861
871	3.596	1279136
872	3.627	1264719
873	3.658	1250506
874	3.689	1243844
875	3.72	1220704
876	3.751	1210013
877	3.782	1199447
878	3.813	1187727
879	3.844	1183023
880	3.875	1167574
881	3.906	1160476
882	3.937	1153000
883	3.968	1142789
884	3.999	1141511
885	4.03	1123023
886	4.061	1115170
887	4.092	1108514
888	4.123	1102203
889	4.154	1108324
890	4.185	1097267
891	4.216	1095211
892	4.247	1088036
893	4.278	1083831
894	4.309	1086640
895	4.34	1072504
896	4.371	1065420
897	4.402	1057577
898	4.433	1050392
899	4.464	1047764
900	4.495	1034956
901	4.526	1032278
902	4.557	1025512
903	4.588	1022120
904	4.619	1022888
905	4.65	1014129
906	4.681	1011453
907	4.712	1007861
908	4.743	1010092
909	4.774	1014550
910	4.805	1006670
911	4.836	1005757
912	4.867	1005546
913	4.898	1005574
914	4.929	1010238
915	4.96	1005027
916	4.991	1006773
917	5.022	1008721
918	5.053	1006513
919	5.084	1008508
920	5.115	999071
921	5.146	993914
922	5.177	993239
923	5.208	993302
924	5.239	995329
925	5.27	990147
926	5.301	989652
927	5.332	989804
928	5.363	986004
929	5.394	988966
930	5.425	978859
931	5.456	975342
932	5.487	974804
933	5.518	973065
934	5.549	972393
935	5.58	962627
936	5.611	959982
937	5.642	956229
938	5.673	964607
939	5.704	959740
940	5.735	955778
941	5.766	957906
942	5.797	955607
943	5.828	963620
944	5.859	963145
945	5.89	953082
946	5.921	949849
947	5.952	950834
948	5.983	957947
949	6.014	954286
950	6.045	946345
951	6.076	947566
952	6.107	955680
953	6.138	975999
954	6.169	981435
955	6.2	997082
956	6.231	1018373
957	6.262	1043254
958	6.293	1075537
959	6.324	1067084
960	6.355	1064954
961	6.386	1056356
962	6.417	1050186
963	6.448	1046716
964	6.479	1032914
965	6.51	1022590
966	6.541	1012884
967	6.572	1008000
968	6.603	999063
969	6.634	982067
970	6.665	970123
971	6.696	957122
972	6.727	952974
973	6.758	938154
974	6.789	923109
975	6.82	916640
976	6.851	907122
977	6.882	908681
978	6.913	895454
979	6.944	880325
980	6.975	873619
981	7.006	868251
